# Supplementary material
Source: PubMed Central journal article supplement (PMC5687503)
Supplement: NIHMS916947-supplement-SI.pdf [file NIHMS916947-supplement-SI.pdf]

## **Supporting information**

# Gut microbiota modulation attenuated the hypolipidemic effect of simvastatin in high-fat/cholesterol-diet fed mice

*Xuyun He,<sup>1†</sup> Ningning Zheng,<sup>1†</sup> Jiaojiao He,<sup>1†</sup> Can Liu,<sup>2</sup> Jing Feng,<sup>2</sup> Wei Jia,<sup>3,4\*</sup> and Houkai Li<sup>1\*</sup>*

<sup>1</sup>Center for Chinese Medical Therapy and Systems Biology, Shanghai University of Traditional Chinese Medicine, Shanghai 201203, China

<sup>2</sup>Laboratory medicine of Southern Medical University Affiliated Fengxian Hospital, Shanghai 201499, China

<sup>3</sup>Center for Translational Medicine, and Shanghai Key Laboratory of Diabetes Mellitus, Shanghai Jiao Tong University Affiliated Sixth People's Hospital, Shanghai 200233, China

<sup>4</sup>Cancer Epidemiology Program, University of Hawaii Cancer Center, Honolulu, Hawaii, 96813, USA

## **Table of contents**

Table S1

Figure S1

**Table S1. Summary of the PCA and PLS-DA Models<sup>a</sup>**

| Groups                     | PCA model         |                 | PLS-DA model      |                 |                |
|----------------------------|-------------------|-----------------|-------------------|-----------------|----------------|
|                            | No. of components | $R^2X$<br>(cum) | No. of components | $R^2Y$<br>(cum) | $Q^2$<br>(cum) |
| All of the 5 groups        | 5                 | 0.605           | 7                 | 0.887           | 0.531          |
| 4 groups, except Con group | 4                 | 0.512           | 7                 | 0.913           | 0.446          |

<sup>a</sup>  $R^2X$  (cum) represents the cumulative Sum of Squares of the  $X$  explained by all extracted components,  $R^2Y$  provides an estimate of how well the model fits the  $Y$  data, and  $Q^2$  is an estimate of how well the model predicts the  $Y$ . Cumulative values of  $R^2X$ ,  $R^2Y$ , and  $Q^2$  close to 1 indicate an excellent model.

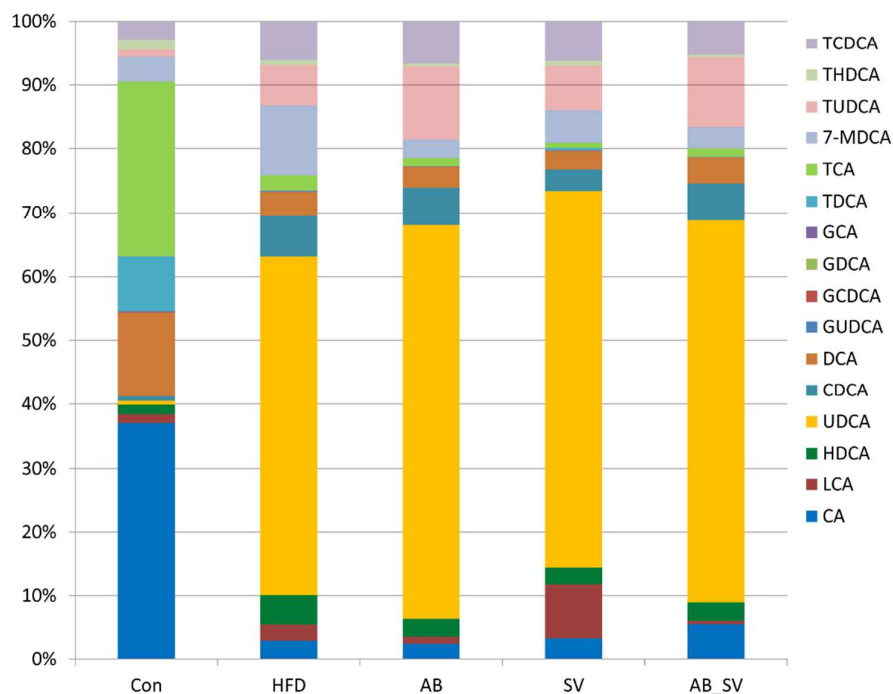

**Figure S1.** The relative abundance of detected serum bile acids among groups. Con: control group; HFD: high-fat/cholesterol diet group; AB: antibiotic group; SV: simvastatin (20 mg/kg) group; AB\_SV: simvastatin (20 mg/kg) in the presence of antibiotic treatment.
